# Supplementary material for: Highly bright tunable blue-violet photoluminescence in SiC nanocrystal–sodium dodecyl sulfonate crosslinked network
Source: Royal Society of Chemistry journal article supplement (doi:10.1039/c2nr30626c), 2012-01-01
Supplement: c2nr30626c.pdf [file c2nr30626c.pdf]

## Supplementary Information

### Highly-bright tunable blue-violet photoluminescence in SiC nanocrystal-sodium dodecyl sulfonate crosslinked network

Dejian Dai, Nan Zhang, Wenxia Zhang, and Jiyang Fan\*

Department of Physics, Southeast University, Nanjing 211189, PR China

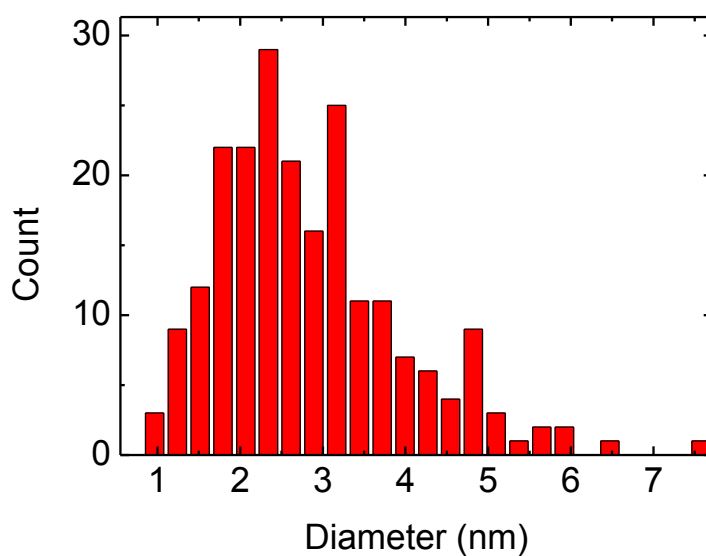

**Fig. S1** Histogram of the size distribution of the SiC nanocrystals in the SiC quantum dots-sodium dodecyl sulfonate crosslinked network counted for over 200 particles in the TEM image.
